# Supplementary material for: Detection of Expressional Changes Induced by Intrauterine Growth Restriction in the Developing Rat Mammary Gland via Exploratory Pathways Analysis
Source: PubMed Central journal article supplement (PMC4067350; doi:10.1371/journal.pone.0100504), 2014-06-23
Supplement: pone.0100504.s002.pdf [file pone.0100504.s002.pdf]

Analysis Name: filtered d21 2 0.05 rat exp alltissues neu\_2 alldatasource

Analysis Creation Date: 2013-06-24

Build version: 220217

Content version: 16542223 (Release Date: 2013-05-13)

## Analysis settings

[View](#)

Reference set: SurePrint G3 Rat GE 8x60K Microarray

Relationship to include: Direct and Indirect

Includes Endogenous Chemicals

Optional Analyses:

Filter Summary:

Consider only molecules and/or relationships where

(species = Rat) AND

(confidence = Experimentally Observed)

Cutoff:

Fold Change = 2,000

p-value = 5,00E-02

## Top Networks

I Associated Network Functions  
D

Score

|   |                                                                                           |    |
|---|-------------------------------------------------------------------------------------------|----|
| 1 | Lipid Metabolism, Molecular Transport, Small Molecule Biochemistry                        | 16 |
| 2 | Cell-To-Cell Signaling and Interaction, Nervous System Development and Function, Behavior | 15 |
| 3 | Cancer, Cellular Assembly and Organization, Cellular Compromise                           | 2  |
| 4 | Cell Death and Survival, Cellular Function and Maintenance, Small Molecule Biochemistry   | 2  |
| 5 | Nucleic Acid Metabolism, Small Molecule Biochemistry, Cancer                              | 2  |

## Top Bio Functions

### Diseases and Disorders

| Name                            | p-value             | # Molecules |
|---------------------------------|---------------------|-------------|
| Inflammatory Response           | 7,39E-05 - 4,64E-02 | 9           |
| Cancer                          | 1,34E-03 - 4,24E-02 | 9           |
| Neurological Disease            | 4,90E-03 - 3,12E-02 | 6           |
| Renal and Urological Disease    | 4,90E-03 - 2,66E-02 | 7           |
| Skeletal and Muscular Disorders | 1,02E-02 - 3,12E-02 | 2           |

### Molecular and Cellular Functions

| Name                                   | p-value             | # Molecules |
|----------------------------------------|---------------------|-------------|
| Cell-To-Cell Signaling and Interaction | 3,41E-04 - 4,64E-02 | 16          |
| Cell Death and Survival                | 1,44E-03 - 4,64E-02 | 6           |
| Drug Metabolism                        | 1,44E-03 - 4,64E-02 | 5           |
| Lipid Metabolism                       | 1,44E-03 - 4,64E-02 | 12          |
| Molecular Transport                    | 1,44E-03 - 4,64E-02 | 17          |

### Physiological System Development and Function

| Name                                                    | p-value             | # Molecules |
|---------------------------------------------------------|---------------------|-------------|
| Hematological System Development and Function           | 3,41E-04 - 4,64E-02 | 11          |
| Immune Cell Trafficking                                 | 3,54E-03 - 4,64E-02 | 5           |
| Nervous System Development and Function                 | 4,13E-03 - 4,64E-02 | 11          |
| Auditory and Vestibular System Development and Function | 1,57E-02 - 1,57E-02 | 1           |
| Behavior                                                | 1,57E-02 - 4,64E-02 | 2           |

## Top Canonical Pathways

| Name                                  | p-value  | Ratio        |
|---------------------------------------|----------|--------------|
| Nicotine Degradation III              | 4,59E-05 | 6/48 (0,125) |
| Melatonin Degradation I               | 4,59E-05 | 6/48 (0,125) |
| Superpathway of Melatonin Degradation | 6,86E-05 | 6/52 (0,115) |
| Autoimmune Thyroid Disease Signaling  | 9,46E-05 | 5/34 (0,147) |
| Nicotine Degradation II               | 1,4E-04  | 6/57 (0,105) |

## Top Molecules

## Fold Change up-regulated

| Molecules | Exp. Value | Exp. Chart |
|-----------|------------|------------|
| NPHS2     | ↑15,206    |            |
| A1CF      | ↑13,886    |            |
| KRT35     | ↑8,849     |            |
| POU3F3    | ↑8,174     |            |
| GALR1     | ↑7,185     |            |
| UGT2B7    | ↑6,714     |            |
| WT1       | ↑5,316     |            |
| Idi2      | ↑5,069     |            |
| IFNK      | ↑4,682     |            |
| CALB1     | ↑3,917     |            |

## Fold Change down-regulated

| Molecules | Exp. Value | Exp. Chart |
|-----------|------------|------------|
| TNFRSF17  | ↓-6,340    |            |
| CYP3A4    | ↓-6,030    |            |
| SULT2A1   | ↓-5,586    |            |

|                         |         |
|-------------------------|---------|
| APOH                    | ↓-5,337 |
| RNASE3                  | ↓-5,217 |
| Mug1/Mug2               | ↓-5,110 |
| HRG                     | ↓-4,556 |
| Klra5 (includes others) | ↓-4,461 |
| Try4/Try5               | ↓-4,420 |
| Ugt2b                   | ↓-4,097 |

### Top Upstream Regulators

| Upstream Regulator | p-value of overlap | Predicted Activation State |
|--------------------|--------------------|----------------------------|
| LEPR               | 6,70E-03           |                            |
| GPRASP1            | 1,50E-02           |                            |
| SREBF1             | 2,34E-02           |                            |
| NR1I2              | 2,97E-02           |                            |

### Top Tox Lists

| Name                                                      | p-value  | Ratio         |
|-----------------------------------------------------------|----------|---------------|
| Cytochrome P450 Panel - Substrate is a Xenobiotic (Human) | 9,31E-05 | 4/16 (0,25)   |
| Fatty Acid Metabolism                                     | 2,8E-04  | 8/108 (0,074) |
| Cytochrome P450 Panel - Substrate is a Xenobiotic (Rat)   | 6,76E-04 | 4/26 (0,154)  |
| VDR/RXR Activation                                        | 1,07E-03 | 6/75 (0,08)   |
| LXR/RXR Activation                                        | 1,19E-03 | 7/106 (0,066) |

**Top Tox Functions****Hepatotoxicity**

| Name                                 | p-value             | # Molecules |
|--------------------------------------|---------------------|-------------|
| Glutathione Depletion In Liver       | 3,54E-03 - 1,60E-01 | 3           |
| Liver Fibrosis                       | 3,54E-03 - 3,54E-03 | 2           |
| Hepatocellular Carcinoma             | 1,57E-02 - 1,57E-02 | 1           |
| Liver Hyperplasia/Hyperproliferation | 1,57E-02 - 1,57E-02 | 1           |
| Liver Inflammation/Hepatitis         | 1,57E-02 - 1,57E-02 | 1           |

**Nephrotoxicity**

| Name                 | p-value             | # Molecules |
|----------------------|---------------------|-------------|
| Kidney Failure       | 4,90E-03 - 4,90E-03 | 2           |
| Renal Transformation | 3,12E-02 - 3,12E-02 | 1           |
| Glomerular Injury    | 1,05E-01 - 1,05E-01 | 1           |
| Renal Fibrosis       | 1,05E-01 - 1,05E-01 | 1           |
| Renal Damage         | 1,60E-01 - 1,76E-01 | 4           |
