# Supplementary material for: Detection of Expressional Changes Induced by Intrauterine Growth Restriction in the Developing Rat Mammary Gland via Exploratory Pathways Analysis
Source: PubMed Central journal article supplement (PMC4067350; doi:10.1371/journal.pone.0100504), 2014-06-23
Supplement: pone.0100504.s003.pdf [file pone.0100504.s003.pdf]

Analysis Name: filtered d28 2 0.05 rat exp alltissues neu\_2 alldatasource

Analysis Creation Date: 2013-06-24

Build version: 220217

Content version: 16542223 (Release Date: 2013-05-13)

## Analysis settings

[View](#)

Reference set: SurePrint G3 Rat GE 8x60K Microarray

Relationship to include: Direct and Indirect

Includes Endogenous Chemicals

Optional Analyses:

Filter Summary:

Consider only molecules and/or relationships where

(species = Rat) AND

(confidence = Experimentally Observed)

Cutoff:

Fold Change = 2,000

p-value = 5,00E-02

## Top Networks

| ID | Associated Network Functions                                   | Score |
|----|----------------------------------------------------------------|-------|
| 1  | Drug Metabolism, Lipid Metabolism, Small Molecule Biochemistry | 16    |

|   |                                                                                                         |    |
|---|---------------------------------------------------------------------------------------------------------|----|
| 2 | Cardiovascular System Development and Function, Hematological System Development and Function, Behavior | 12 |
| 3 | Organismal Injury and Abnormalities, Cardiovascular Disease, Psychological Disorders                    | 3  |
| 4 | Cell Morphology, Drug Metabolism, Hair and Skin Development and Function                                | 2  |
| 5 | Developmental Disorder, Embryonic Development, Hereditary Disorder                                      | 2  |

## Top Bio Functions

### Diseases and Disorders

| Name                            | p-value             | # Molecules |
|---------------------------------|---------------------|-------------|
| Connective Tissue Disorders     | 8,24E-03 - 1,91E-02 | 3           |
| Inflammatory Disease            | 8,24E-03 - 4,97E-02 | 4           |
| Skeletal and Muscular Disorders | 8,24E-03 - 1,91E-02 | 3           |
| Cancer                          | 1,27E-02 - 1,31E-02 | 5           |
| Cardiovascular Disease          | 1,27E-02 - 3,75E-02 | 1           |

### Molecular and Cellular Functions

| Name                        | p-value             | # Molecules |
|-----------------------------|---------------------|-------------|
| Amino Acid Metabolism       | 8,12E-04 - 3,75E-02 | 4           |
| Molecular Transport         | 8,12E-04 - 4,97E-02 | 7           |
| Small Molecule Biochemistry | 8,12E-04 - 4,97E-02 | 11          |
| Cellular Development        | 1,55E-03 - 4,97E-02 | 6           |
| Carbohydrate Metabolism     | 1,27E-02 - 4,97E-02 | 2           |

### Physiological System Development and Function

| Name                                                  | p-value             | # Molecules |
|-------------------------------------------------------|---------------------|-------------|
| Skeletal and Muscular System Development and Function | 4,25E-03 - 4,97E-02 | 5           |
| Embryonic Development                                 | 1,05E-02 - 4,97E-02 | 5           |
| Organ Development                                     | 1,05E-02 - 4,97E-02 | 5           |
| Organismal Development                                | 1,05E-02 - 4,97E-02 | 5           |
| Tissue Development                                    | 1,05E-02 - 4,97E-02 | 8           |

## Top Canonical Pathways

| Name                                                               | p-value  | Ratio         |
|--------------------------------------------------------------------|----------|---------------|
| Thyroid Hormone Metabolism II (via Conjugation and/or Degradation) | 2,24E-03 | 3/27 (0,111)  |
| Phototransduction Pathway                                          | 2,9E-03  | 4/47 (0,085)  |
| Thiamin Salvage III                                                | 1,27E-02 | 1/1 (1)       |
| cAMP-mediated signaling                                            | 1,48E-02 | 7/204 (0,034) |
| Melatonin Degradation I                                            | 1,6E-02  | 3/48 (0,062)  |

## Top Molecules

### Fold Change up-regulated

| Molecules | Exp. Value | Exp. Chart |
|-----------|------------|------------|
| MYF6      | ↑12,118    |            |
| MYOD1     | ↑9,330     |            |
| IGSF5     | ↑8,386     |            |
| TPK1      | ↑8,079     |            |
| CADPS     | ↑7,785     |            |
| PITX2     | ↑6,851     |            |
| PPP1R3A   | ↑6,619     |            |
| GZMB      | ↑5,963     |            |
| KCNJ10    | ↑5,749     |            |
| CHRM5     | ↑5,735     |            |

### Fold Change down-regulated

| Molecules | Exp. Value | Exp. Chart |
|-----------|------------|------------|
| BMP10     | ↓-8,574    |            |
| GLB1L3    | ↓-3,993    |            |
| CNGA1     | ↓-3,362    |            |

|         |         |
|---------|---------|
| NR1D1   | ↓-3,221 |
| SVOP    | ↓-3,126 |
| MYH6    | ↓-2,515 |
| OLFM3   | ↓-2,513 |
| TNR     | ↓-2,489 |
| CCR4    | ↓-2,464 |
| DNAJC27 | ↓-2,382 |

### Top Upstream Regulators

| Upstream Regulator | p-value of overlap | Predicted Activation State |
|--------------------|--------------------|----------------------------|
| TNFRSF1A           | 5,11E-04           |                            |
| Pkc(s)             | 5,76E-03           |                            |
| THRA               | 1,31E-02           |                            |
| ARG1               | 1,31E-02           |                            |
| TNFRSF1B           | 2,61E-02           |                            |

### Top Tox Lists

| Name                                                      | p-value  | Ratio        |
|-----------------------------------------------------------|----------|--------------|
| Cytochrome P450 Panel - Substrate is a Xenobiotic (Mouse) | 3,12E-02 | 2/23 (0,087) |
| Nongenotoxic Hepatocarcinogenicity Biomarker Panel        | 3,12E-02 | 2/22 (0,091) |
| CAR/RXR Activation                                        | 3,95E-02 | 2/26 (0,077) |
| Cytochrome P450 Panel - Substrate is a Xenobiotic (Rat)   | 4,25E-02 | 2/26 (0,077) |
| Reversible Glomerulonephritis Biomarker Panel (Rat)       | 4,55E-02 | 2/27 (0,074) |

**Top Tox Functions****Cardiotoxicity**

| Name                                | p-value             | # Molecules |
|-------------------------------------|---------------------|-------------|
| <a href="#">Cardiac Hypertrophy</a> | 1,27E-02 - 7,36E-02 | 2           |
| <a href="#">Cardiac Arrythmia</a>   | 3,75E-02 - 3,75E-02 | 1           |
| <a href="#">Cardiac Damage</a>      | 3,75E-02 - 3,75E-02 | 1           |
| <a href="#">Tachycardia</a>         | 3,75E-02 - 3,75E-02 | 1           |

**Hepatotoxicity**

| Name                                      | p-value             | # Molecules |
|-------------------------------------------|---------------------|-------------|
| <a href="#">Liver Proliferation</a>       | 1,27E-02 - 1,27E-02 | 1           |
| <a href="#">Liver Necrosis/Cell Death</a> | 2,73E-01 - 2,73E-01 | 1           |

**Nephrotoxicity**

| Name                                      | p-value             | # Molecules |
|-------------------------------------------|---------------------|-------------|
| <a href="#">Renal Necrosis/Cell Death</a> | 7,36E-02 - 7,36E-02 | 1           |
